# Supplementary material for: Natural variation in CBF gene sequence, gene expression and freezing tolerance in the Versailles core collection of Arabidopsis thaliana
Source: PubMed Central journal article supplement (PMC2579297; doi:10.1186/1471-2229-8-105), 2008-10-15

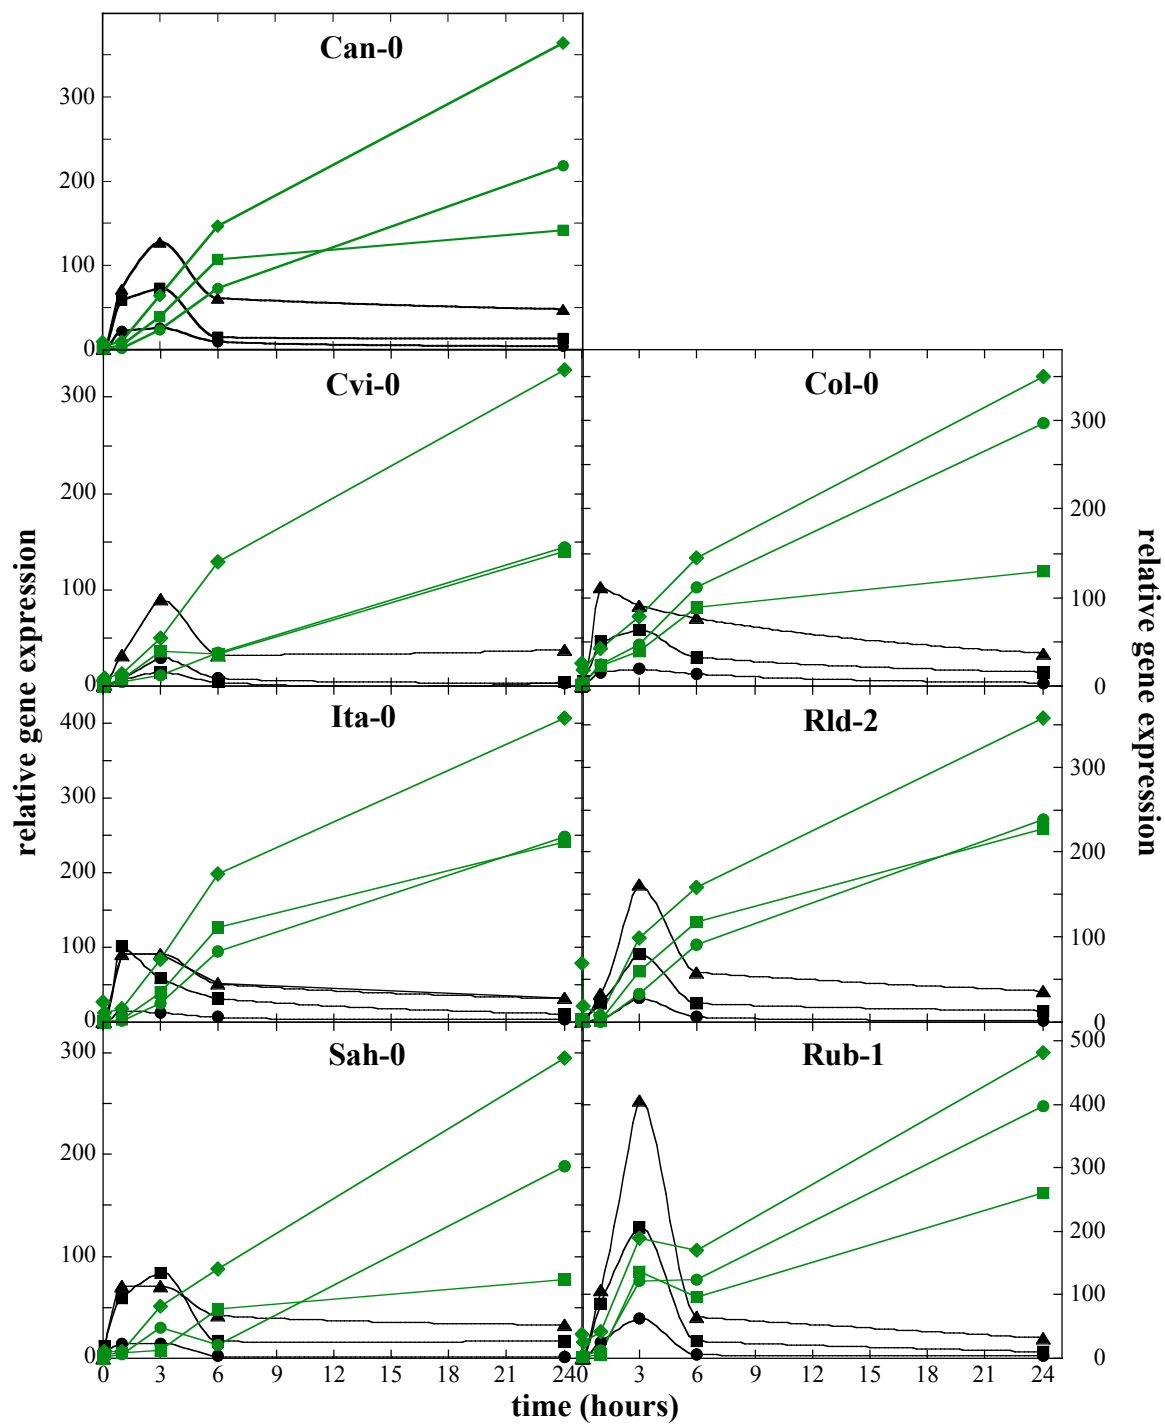

Supplement: 1471-2229-8-105-S6.pdf [file 1471-2229-8-105-S6.pdf]
